# Supplementary material for: Utility of ultra-sensitive qPCR to detect Plasmodium falciparum and Plasmodium vivax infections under different transmission intensities
Source: PubMed Central journal article supplement (PMC7469345; doi:10.1186/s12936-020-03374-7), 2020-09-03
Supplement: 12936_2020_3374_MOESM1_ESM.pdf [file 12936_2020_3374_MOESM1_ESM.pdf]

**Table S1: Performance details of ultra-sensitive *P. falciparum* and *P. vivax* qPCR assays and efficiencies of plasmid standard trendlines generated at 3 different study sites.**

| <b>Assay</b>      | <b>Country</b> | <b>Slope</b> | <b>Intercept</b> | <b>Efficiency</b> | <b>R2</b> |
|-------------------|----------------|--------------|------------------|-------------------|-----------|
| <i>Pf</i> _varATS | Thailand       | -3.3         | 41.1             | 101.0%            | 0.99      |
| <i>Pf</i> _varATS | Brazil         | -3.5         | 42.8             | 93.1%             | 0.95      |
| <i>Pf</i> _varATS | PNG            | -3.7         | 43.5             | 86.3%             | 1         |
| <i>Pv</i> _mtCOX1 | Thailand       | -3.3         | 37.1             | 101.0%            | 1         |
| <i>Pv</i> _mtCOX1 | Brazil         | -3.2         | 37.7             | 105.4%            | 0.99      |
| <i>Pv</i> _mtCOX1 | PNG            | -3.3         | 37.1             | 101.0             | 0.99      |
